# Supplementary material
Source: MDPI journal article supplement (https://www.mdpi.com/2073-4441/14/3/426)
Supplement: s1 [file s1]

Table S1: Predicted water head for observation points for the the years 1995 through 2000

| Year 1995        |                   |                |           |                       |           |
|------------------|-------------------|----------------|-----------|-----------------------|-----------|
| Observation Well | Observed Head (m) | MODFLOW (m)    |           | MODFLOW + Kriging (m) |           |
|                  |                   | Simulated Head | Residuals | Simulated Head        | Residuals |
| 1                | 787.3             | 804.9          | -17.6     | 786.0                 | 1.3       |
| 2                | 751.9             | 785.6          | -33.7     | 753.8                 | -1.9      |
| 3                | 750.6             | 784.5          | -33.9     | 751.6                 | -1.0      |
| 4                | 752.5             | 776.5          | -24.0     | 751.7                 | 0.8       |
| 5                | 741.5             | 776.7          | -35.3     | 748.6                 | -7.1      |
| 6                | 736.1             | 768.2          | -32.2     | 742.3                 | -6.2      |
| 7                | 718.1             | 733.1          | -15.0     | 709.2                 | 8.9       |
| 8                | 754.3             | 828.9          | -74.7     | 725.0                 | 29.3      |
| 9                | 840.3             | 972.1          | -131.8    | 839.6                 | 0.8       |
| 10               | 893.4             | 954.1          | -60.7     | 876.1                 | 17.3      |
| 11               | 900.0             | 934.5          | -34.5     | 880.2                 | 19.9      |
| 12               | 650.2             | 700.2          | -50.0     | 645.1                 | 5.1       |
| 13               | 586.7             | 608.5          | -21.8     | 588.0                 | -1.3      |
|                  |                   | Mean =         | -43.5     |                       | 5.1       |
|                  |                   | St Error=      | 8.7       |                       | 3.0       |

| Year 1996        |                   |                |           |                       |           |
|------------------|-------------------|----------------|-----------|-----------------------|-----------|
| Observation Well | Observed Head (m) | MODFLOW (m)    |           | MODFLOW + Kriging (m) |           |
|                  |                   | Simulated Head | Residuals | Simulated Head        | Residuals |
| 1                | 641.6             | 653.5          | -11.9     | 622.4                 | 19.2      |
| 2                | 642.3             | 682.4          | -40.1     | 635.7                 | 6.6       |
| 3                | 718.2             | 756.9          | -38.7     | 714.8                 | 3.4       |
| 4                | 1056.0            | 995.1          | 61.0      | 1035.4                | 20.7      |
| 5                | 878.3             | 993.5          | -115.3    | 850.4                 | 27.9      |
| 6                | 842.8             | 980.9          | -138.1    | 849.7                 | -6.9      |
| 7                | 609.3             | 680.0          | -70.7     | 579.5                 | 29.8      |
| 8                | 586.8             | 608.4          | -21.6     | 576.1                 | 10.6      |
| 9                | 677.6             | 736.3          | -58.6     | 690.3                 | -12.6     |
| 10               | 618.9             | 663.8          | -44.8     | 618.9                 | 0.0       |
| 11               | 652.7             | 602.4          | 50.3      | 600.6                 | 52.1      |
| 12               | 599.8             | 597.0          | 2.7       | 611.0                 | -11.2     |
| 13               | 612.6             | 628.4          | -15.7     | 612.2                 | 0.5       |
| 14               | 629.6             | 628.0          | 1.6       | 650.1                 | -20.5     |
|                  |                   | Mean =         | -31.4     |                       | 8.5       |
|                  |                   | St Error=      | 14.7      |                       | 5.3       |

Continued

| Year 1997        |                   |                |           |                       |           |
|------------------|-------------------|----------------|-----------|-----------------------|-----------|
| Observation Well | Observed Head (m) | MODFLOW (m)    |           | MODFLOW + Kriging (m) |           |
|                  |                   | Simulated Head | Residuals | Simulated Head        | Residuals |
| 1                | 631.0             | 649.4          | -18.4     | 642.1                 | -11.1     |
| 2                | 593.3             | 595.1          | -1.8      | 611.8                 | -18.5     |
| 3                | 615.8             | 656.7          | -40.9     | 622.7                 | -6.8      |
| 4                | 776.3             | 804.5          | -28.1     | 779.5                 | -3.1      |
| 5                | 772.9             | 801.7          | -28.8     | 772.6                 | 0.3       |
| 6                | 771.5             | 801.7          | -30.2     | 773.4                 | -1.9      |
| 7                | 926.5             | 933.4          | -6.9      | 927.2                 | -0.7      |
| 8                | 879.3             | 912.2          | -32.9     | 856.0                 | 23.3      |
| 9                | 932.0             | 938.7          | -6.7      | 906.2                 | 25.9      |
| 10               | 906.8             | 927.2          | -20.4     | 895.1                 | 11.7      |
| 11               | 668.1             | 724.7          | -56.6     | 668.9                 | -0.8      |
| 12               | 614.2             | 696.6          | -82.3     | 628.3                 | -14.1     |
| 13               | 520.2             | 529.0          | -8.8      | 497.9                 | 22.3      |
| 14               | 660.6             | 697.1          | -36.6     | 652.2                 | 8.3       |
| 15               | 659.1             | 652.4          | 6.7       | 659.1                 | 0.0       |
| 16               | 336.0             | 319.8          | 16.2      | 315.4                 | 20.6      |
| 17               | 346.8             | 389.0          | -42.2     | 308.0                 | 38.7      |
|                  |                   | Mean =         | -24.6     |                       | 5.5       |
|                  |                   | St Error=      | 5.9       |                       | 3.9       |

| Year 1998        |                   |                |           |                       |           |
|------------------|-------------------|----------------|-----------|-----------------------|-----------|
| Observation Well | Observed Head (m) | MODFLOW (m)    |           | MODFLOW + Kriging (m) |           |
|                  |                   | Simulated Head | Residuals | Simulated Head        | Residuals |
| 1                | 762.1             | 779.1          | -17.0     | 761.3                 | 0.8       |
| 2                | 765.5             | 796.9          | -31.4     | 772.5                 | -7.0      |
| 3                | 770.6             | 792.6          | -22.0     | 769.2                 | 1.4       |
| 4                | 769.1             | 800.3          | -31.2     | 775.5                 | -6.4      |
| 5                | 810.2             | 944.7          | -134.5    | 897.5                 | -87.3     |
| 6                | 846.5             | 911.6          | -65.1     | 835.3                 | 11.2      |
| 7                | 890.9             | 919.4          | -28.4     | 874.3                 | 16.6      |
| 8                | 656.5             | 719.7          | -63.2     | 656.2                 | 0.3       |
| 9                | 645.6             | 687.1          | -41.5     | 634.4                 | 11.2      |
| 10               | 646.7             | 701.6          | -54.9     | 650.8                 | -4.1      |
| 11               | 642.9             | 694.8          | -51.9     | 648.4                 | -5.5      |
| 12               | 609.1             | 667.5          | -58.4     | 607.5                 | 1.6       |
| 13               | 622.9             | 623.5          | -0.6      | 613.3                 | 9.5       |
| 14               | 666.2             | 604.2          | 62.0      | 593.4                 | 72.9      |
| 15               | 317.7             | 351.4          | -33.7     | 329.8                 | -12.2     |
|                  |                   | Mean =         | -38.1     |                       | 0.2       |
|                  |                   | St Error=      | 10.7      |                       | 8.1       |

Continued

| Year 1999        |                   |                |           |                       |           |
|------------------|-------------------|----------------|-----------|-----------------------|-----------|
| Observation Well | Observed Head (m) | MODFLOW (m)    |           | MODFLOW + Kriging (m) |           |
|                  |                   | Simulated Head | Residuals | Simulated Head        | Residuals |
| 1                | 781.5             | 791.8          | -10.3     | 765.5                 | 16.0      |
| 2                | 774.2             | 798.2          | -24.0     | 775.1                 | -0.9      |
| 3                | 752.2             | 771.5          | -19.3     | 752.0                 | 0.1       |
| 4                | 757.5             | 786.9          | -29.3     | 757.3                 | 0.3       |
| 5                | 739.1             | 764.5          | -25.4     | 741.7                 | -2.6      |
| 6                | 926.6             | 933.1          | -6.5      | 965.1                 | -38.6     |
| 7                | 1059.5            | 994.0          | 65.5      | 1023.7                | 35.8      |
| 8                | 698.8             | 737.3          | -38.4     | 698.2                 | 0.7       |
| 9                | 668.0             | 722.8          | -54.8     | 670.6                 | -2.7      |
| 10               | 641.2             | 706.6          | -65.4     | 635.6                 | 5.6       |
| 11               | 650.1             | 699.5          | -49.4     | 659.5                 | -9.4      |
| 12               | 619.4             | 653.0          | -33.6     | 598.6                 | 20.8      |
| 13               | 644.9             | 701.6          | -56.7     | 653.7                 | -8.9      |
| 14               | 653.0             | 690.0          | -37.0     | 639.9                 | 13.1      |
| 15               | 606.4             | 666.1          | -59.6     | 596.7                 | 9.7       |
| 16               | 596.2             | 664.3          | -68.1     | 600.9                 | -4.7      |
| 17               | 612.2             | 581.2          | 31.0      | 604.6                 | 7.6       |
|                  |                   | Mean =         | -28.3     |                       | 2.5       |
|                  |                   | St Error=      | 8.4       |                       | 3.8       |

| Year 2000        |                   |                |           |                       |           |
|------------------|-------------------|----------------|-----------|-----------------------|-----------|
| Observation Well | Observed Head (m) | MODFLOW (m)    |           | MODFLOW + Kriging (m) |           |
|                  |                   | Simulated Head | Residuals | Simulated Head        | Residuals |
| 1                | 769.0             | 786.9          | -17.9     | 764.4                 | 4.6       |
| 2                | 745.7             | 760.1          | -14.4     | 741.8                 | 3.8       |
| 3                | 748.3             | 868.8          | -120.5    | 797.2                 | -48.9     |
| 4                | 1059.2            | 993.6          | 65.6      | 1034.6                | 24.7      |
| 5                | 662.2             | 713.2          | -50.9     | 652.3                 | 10.0      |
| 6                | 548.9             | 595.9          | -47.0     | 552.5                 | -3.6      |
| 7                | 586.6             | 608.2          | -21.6     | 574.7                 | 12.0      |
| 8                | 648.8             | 695.0          | -46.2     | 647.2                 | 1.6       |
| 9                | 585.0             | 617.7          | -32.6     | 570.1                 | 14.9      |
| 10               | 616.1             | 663.8          | -47.7     | 618.4                 | -2.3      |
| 11               | 613.4             | 619.5          | -6.2      | 602.2                 | 11.1      |
| 12               | 618.5             | 623.3          | -4.8      | 629.4                 | -10.9     |
| 13               | 623.6             | 620.6          | 3.0       | 624.1                 | -0.5      |
| 14               | 588.9             | 568.3          | 20.5      | 594.0                 | -5.1      |
| 15               | 555.1             | 568.4          | -13.3     | 593.0                 | -37.8     |
| 16               | 346.3             | 344.7          | 1.6       | 347.4                 | -1.2      |
|                  |                   | Mean =         | -20.8     |                       | -1.7      |
|                  |                   | St Error=      | 10.0      |                       | 4.6       |
